# Supplementary material for: A causal association between lipid-lowering medications and rotator cuff syndrome: a drug-targeted mendelian randomization study
Source: Front Genet. 2024 Jun 6;15:1383646. doi: 10.3389/fgene.2024.1383646 (PMC11187090; doi:10.3389/fgene.2024.1383646)
Supplement: Supplementary file 1 [file Table2.XLSX]

## Sheet: Table S1
Table S1. Phenotype descriptions and data distributions
Phenotypes	N Cases	N Controls	Sample Size	Population	Consortium	GWAS ID	PMID	Year	Data availability
LipidS
Low Density Lipoprotein Cholesterol(LDL)			440546	European	UK Biobank	ieu-b-110	32203549	2020	https://gwas.mrcieu.ac.uk
Triglycerides(TG)			441016	European	UK Biobank	ieu-b-111	32203549	2020	https://gwas.mrcieu.ac.uk
Total Cholesterol(TC)			187365	96% European	Global Lipids Genetics Consortium (GLGC)	ieu-a-301	24097068	2013	https://gwas.mrcieu.ac.uk
Rotator cuff syndrome	24061	275212		European	FinnGen(R9)				https://r9.finngen.fi
Positive control
Coronary heart disease	60801	123504	184305	77% European ancestry	CARDIoGRAMplusC4D	ieu-a-7	26343387	2015	https://gwas.mrcieu.ac.uk
Mediating factor
Body mass index(BMI)			336107	European	Neale Lab	ukb-a-248		2017	https://gwas.mrcieu.ac.uk
Waist circumference			232101	European	GIANT	ieu-a-61		2015	https://gwas.mrcieu.ac.uk
Diabetes	22340	439238	461578	European	MRC-IEU	ukb-b-10753		2018	https://gwas.mrcieu.ac.uk
eQTL
eQTLgen			31684	Europena	eQTLGen Consortium				https://eqtlgen.org/
GTExV8			948	White (84.6%) African American ancestry. (12.9%) Asian ancestry. (1.3%)	Gtex Consotrium				https://console.cloud.google.com/storage/browser/gtex-resources

## Sheet: Table S2
Table S2. Genetic variants that were used as instruments for lipids
LDL-C（low-density lipoprotein cholesterol）									TG（triglyceride）									TC（total cholesterol）
SNP	Effect allele	Other allele	Effect allele frequency	Beta	Se	P value	F		SNP	Effect allele	Other allele	Effect allele frequency	Beta	Se	P value	F		SNP	Effect allele	Other allele	Effect allele frequency	Beta	Se	P value	F
rs10231941	C	T	0.177717	0.0198565	0.00272709	3.3e-13	285.844		rs1009360	T	C	0.58141	0.0184832	0.00200785	3.4e-20	126.168		rs10088180	A	G	0.3219	0.0228	0.004	6.01797e-10	132.186
rs10448340	T	G	0.680235	0.0150594	0.00223737	1.7e-11	63.9042		rs10152471	G	A	0.611344	0.0135209	0.00204778	4e-11	62.6789		rs10468017	T	C	0.2757	0.0617	0.004	7.23269e-48	1038.98
rs10832963	G	T	0.744224	0.0173059	0.00239616	5.1e-13	67.5049		rs10210970	T	C	0.131448	0.0232557	0.00292788	2e-15	414.712		rs10773003	A	G	0.08839	0.0369	0.0058	4.08301e-09	466.291
rs10910476	T	C	0.555163	0.0123938	0.00210193	3.7e-09	60.2129		rs10242866	T	C	0.398698	0.015793	0.00202877	7e-15	132.323		rs10832962	T	C	0.719	0.0315	0.0039	1.53886e-14	104.541
rs113177823	G	A	0.945864	0.0411737	0.00466039	1e-18	80.8772		rs10277582	C	T	0.881409	0.0173714	0.00308015	1.7e-08	31.5672		rs10900221	A	G	0.2731	0.0255	0.0041	7.96306e-09	177.289
rs115458560	T	C	0.981437	0.0503391	0.0077049	6.4e-11	41.4496		rs1037117	A	G	0.254798	0.0172213	0.00229153	5.7e-14	195.021		rs10904908	G	A	0.4538	0.025	0.0036	2.60076e-11	128.01
rs11568318	A	C	0.066246	0.0256951	0.00417849	7.8e-10	543.863		rs10405944	T	C	0.516923	0.013209	0.00201995	6.2e-11	74.3555		rs11153594	C	T	0.6082	0.029	0.0036	1.2659e-14	123.556
rs11591147	G	T	0.982532	0.348456	0.00793088	1e-200	1876.75		rs1043897	G	T	0.584415	0.014664	0.00201517	3.4e-13	78.8362		rs112201728	T	C	0.05805	0.0581	0.0099	1.19501e-08	1199.13
rs11601507	A	C	0.069468	0.0322012	0.00404981	1.8e-15	851.794		rs10750766	A	C	0.709959	0.0193855	0.00218742	7.8e-19	96.1593		rs11220462	A	G	0.1425	0.0474	0.0058	5.48656e-15	724.742
rs11621792	T	C	0.452867	0.0191489	0.00211033	1.1e-19	176.838		rs1077835	G	A	0.220459	0.0473668	0.00240452	2.2e-86	1548.08		rs11563251	T	C	0.1253	0.0368	0.0059	1.26599e-09	444.94
rs116734477	C	T	0.959163	0.0473368	0.0052819	3.2e-19	80.6402		rs10899490	C	T	0.838631	0.0170082	0.00269347	2.7e-10	41.1776		rs11591147	G	T	0.98285	0.3341	0.0173	8.82673e-86	720.111
rs117139027	G	A	0.982406	0.0571106	0.00792993	5.9e-13	50.5671		rs11000468	C	T	0.744731	0.0148544	0.00231748	1.5e-10	49.6867		rs11694172	G	A	0.2164	0.0277	0.0041	1.95101e-09	225.576
rs1183851	C	T	0.395544	0.024377	0.00213943	4.5e-30	316.707		rs11100083	T	C	0.773786	0.0160248	0.00237585	1.5e-11	51.2435		rs11753995	A	G	0.1464	0.0489	0.0048	1.83908e-23	768.006
rs12162782	G	T	0.344365	0.0129592	0.00219352	3.5e-09	97.0363		rs11240358	A	G	0.394026	0.0135651	0.00202953	2.3e-11	98.374		rs11789603	T	C	0.08971	0.0427	0.0062	1.43913e-11	624.016
rs12208357	T	C	0.070102	0.0569843	0.00409617	5.4e-44	2676.68		rs1133400	G	A	0.219923	0.0137462	0.00239759	9.8e-09	130.051		rs11802413	T	C	0.5369	0.0287	0.0035	1.57616e-14	143.049
rs12246352	G	A	0.103895	0.0257335	0.00342791	6e-14	523.471		rs116843064	G	A	0.980673	0.226505	0.00721009	1e-200	876.326		rs12412743	C	T	0.847	0.0298	0.0047	6.97606e-10	50.9282
rs12445804	A	G	0.074901	0.0229888	0.0040052	9.5e-09	431.187		rs117287238	G	A	0.971815	0.0394324	0.00614684	1.4e-10	38.6586		rs12670798	C	T	0.2243	0.0364	0.0041	9.47764e-17	385.928
rs12471768	C	T	0.704119	0.0135999	0.00228112	2.5e-09	48.2232		rs117291242	T	C	0.036536	0.0297851	0.00528225	1.7e-08	755.197		rs13315871	G	A	0.91953	0.0355	0.0061	3.48001e-08	38.0097
rs13076933	T	G	0.740546	0.020994	0.00239027	1.6e-18	100.779		rs117431393	G	A	0.035446	0.0312254	0.00537977	6.5e-09	831.081		rs138777	A	G	0.3483	0.0214	0.0037	4.74002e-08	111.905
rs13108218	A	G	0.385133	0.0177871	0.0021598	1.8e-16	171.467		rs11746801	G	A	0.362931	0.0123657	0.00207937	2.7e-09	85.9393		rs1535	A	G	0.6372	0.0497	0.0037	8.62383e-39	336.415
rs13121616	G	A	0.693553	0.0128507	0.00226135	1.3e-08	44.5937		rs11904650	G	A	0.020999	0.0410641	0.00692419	3e-09	1460.92		rs17526895	A	G	0.92216	0.042	0.0067	5.77697e-09	51.4679
rs145730801	C	T	0.044378	0.0359995	0.00516918	3.3e-12	1093.9		rs12185242	C	A	0.454836	0.0175265	0.00199898	1.8e-18	147.756		rs1800562	G	A	0.95383	0.0565	0.0077	1.90502e-12	55.246
rs146433259	C	T	0.988264	0.0569699	0.0103828	4.1e-08	33.5633		rs12424054	A	G	0.232437	0.0191212	0.00235346	4.5e-16	247.669		rs1800961	C	T	0.9657	0.1062	0.0101	1.34215e-24	145.076
rs146534110	T	G	0.013304	0.0680211	0.00910045	7.8e-14	4059.52		rs12446515	C	T	0.677111	0.0334207	0.00213589	3.5e-55	318.333		rs181360	T	G	0.8008	0.0278	0.0043	7.31897e-10	57.707
rs150474434	G	A	0.898647	0.0347623	0.00347063	1.3e-23	107.939		rs12475332	T	G	0.739012	0.0140007	0.00225386	5.2e-10	45.1282		rs1883025	C	T	0.7573	0.0671	0.0042	5.7491e-53	410.375
rs1551891	G	A	0.911893	0.173628	0.00366029	1e-200	2352.79		rs12504746	C	T	0.807143	0.0152674	0.00252148	1.4e-09	39.6541		rs1997243	G	A	0.1306	0.0332	0.005	2.719e-10	359.787
rs1556562	T	G	0.790033	0.0190249	0.00248903	2.1e-14	66.9703		rs12530679	A	G	0.51534	0.0121299	0.00201682	1.8e-09	62.9067		rs2000999	A	G	0.1847	0.0617	0.0044	6.80456e-41	1170.33
rs17050272	G	A	0.590725	0.0205597	0.00211549	2.5e-22	152.482		rs12880341	C	T	0.159023	0.0209696	0.00273647	1.8e-14	326.414		rs2030746	T	C	0.3984	0.0199	0.0037	3.60296e-08	89.3176
rs174564	A	G	0.651443	0.0318977	0.0021896	4.5e-48	312.695		rs12902047	A	C	0.686093	0.0129253	0.00214533	1.7e-09	46.2606		rs2066714	C	T	0.1201	0.0442	0.0076	1.136e-08	646.383
rs17476364	T	C	0.891672	0.0216418	0.00335937	1.2e-10	44.7087		rs12926107	G	A	0.454903	0.0126364	0.0020014	2.7e-10	76.7855		rs2073547	G	A	0.1939	0.0456	0.0047	3.83001e-21	630.221
rs17569873	T	C	0.201299	0.0171196	0.00260335	4.8e-11	206.346		rs12928099	C	A	0.703558	0.0282116	0.00218133	2.9e-38	208.201		rs2228603	C	T	0.92876	0.1217	0.0069	1.04906e-62	396.222
rs1801689	C	A	0.030551	0.061862	0.00605788	1.8e-24	3293.27		rs12948505	T	C	0.194119	0.0138887	0.00251214	3.2e-08	137.155		rs2235367	G	A	0.4565	0.0357	0.0035	7.21938e-25	259.929
rs183130	C	T	0.676192	0.0329541	0.00223034	2.1e-49	310.05		rs13066793	A	G	0.909905	0.0224583	0.00347278	1e-10	40.0846		rs2244608	G	A	0.3391	0.0313	0.0037	9.61834e-18	242.942
rs2066714	C	T	0.128775	0.0210151	0.00310964	1.4e-11	339.272		rs13108218	A	G	0.385141	0.0305169	0.00205811	9.7e-50	505.635		rs2255141	A	G	0.3193	0.0314	0.0039	6.51328e-16	251.834
rs2068888	G	A	0.549305	0.0192081	0.00209421	4.6e-20	146.56		rs13269725	G	A	0.078416	0.0349878	0.0036804	2e-21	997.315		rs2287623	G	A	0.405	0.0273	0.0036	4.08507e-12	166.32
rs2073547	G	A	0.184007	0.0355498	0.00267287	2.3e-40	910.495		rs1340819	A	C	0.654989	0.0121655	0.00209472	6.3e-09	45.0423		rs247616	T	C	0.2929	0.0499	0.004	4.46992e-32	662.11
rs2160994	C	T	0.647494	0.0182581	0.00218417	6.3e-17	103.562		rs134551	C	T	0.664562	0.0116536	0.00211111	3.4e-08	40.1842		rs2642438	G	A	0.7454	0.037	0.004	1.28292e-18	130.702
rs2238162	C	T	0.477045	0.0165008	0.00208847	2.8e-15	125.493		rs1347188	G	A	0.245797	0.0139021	0.00231385	1.9e-09	128.605		rs281393	C	T	0.6266	0.0322	0.0055	4.25598e-08	145.191
rs2250802	G	A	0.27566	0.0181939	0.00233224	6.1e-15	211.36		rs138191773	G	A	0.982979	0.0471717	0.00791884	2.6e-09	33.4091		rs2886232	T	C	0.1201	0.0358	0.0062	3.874e-08	423.542
rs2256814	A	G	0.197877	0.0152618	0.00262512	6.1e-09	164.678		rs139386986	C	T	0.907871	0.0216903	0.0035608	1.1e-09	38.2339		rs314253	T	C	0.6649	0.0233	0.0037	2.80802e-10	68.1962
rs2287622	A	G	0.397206	0.0211572	0.00212931	2.9e-23	237.87		rs140107293	A	G	0.845293	0.0227003	0.00275296	1.6e-16	70.3276		rs3757354	C	T	0.7902	0.0348	0.0042	2.21513e-15	95.2579
rs2391825	G	A	0.720781	0.0129848	0.00233356	2.6e-08	41.4836		rs143076454	A	G	0.018647	0.0403999	0.00735364	3.9e-08	1417.3		rs3780181	A	G	0.94723	0.0442	0.0071	6.66807e-10	38.64
rs2618566	G	T	0.340139	0.0249198	0.00219993	9.6e-30	361.342		rs145947882	C	A	0.025952	0.137333	0.0063668	3.4e-103	16821.7		rs4253772	T	C	0.1187	0.0322	0.0058	9.8519e-09	343.041
rs2642438	G	A	0.702657	0.0253218	0.00227308	8e-29	168.048		rs1473886	G	T	0.522376	0.0181218	0.00198519	6.9e-20	138.391		rs4530754	A	G	0.5818	0.0228	0.0035	1.67799e-09	81.5002
rs2738447	C	A	0.592612	0.0422734	0.00211024	2.9e-89	642.385		rs148827772	G	A	0.022544	0.0465516	0.00710636	5.7e-11	1876.26		rs4738684	A	G	0.3522	0.0392	0.0037	1.11609e-23	373.762
rs2740488	A	C	0.734534	0.0252452	0.00236503	1.3e-26	149.119		rs149778057	A	C	0.67168	0.0157568	0.0022259	1.5e-12	71.9097		rs4752805	G	A	0.2467	0.0251	0.0041	1.617e-09	178.01
rs28406917	T	C	0.427624	0.0119057	0.00211433	1.8e-08	71.496		rs150419156	G	A	0.984741	0.0505491	0.00847063	2.4e-09	34.393		rs4988235	G	A	0.4763	0.0308	0.004	3.97466e-14	186.351
rs28590710	G	A	0.803209	0.017618	0.00274759	1.4e-10	53.826		rs150423652	T	G	0.006675	0.285824	0.0122924	1.4e-119	85444.4		rs515135	C	T	0.7823	0.1238	0.0046	6.38263e-151	1258.7
rs28615248	C	T	0.196095	0.0184347	0.00263568	2.7e-12	240.843		rs150460588	C	T	0.044425	0.0326952	0.00484966	1.6e-11	902.826		rs558971	G	A	0.5303	0.0398	0.0036	7.02425e-28	279.222
rs28631087	T	C	0.78726	0.0161901	0.0025459	2e-10	49.1379		rs150555490	C	T	0.943132	0.0384234	0.00427544	2.5e-19	74.0655		rs579459	C	T	0.215	0.062	0.0044	8.82877e-42	1137.62
rs34265667	G	A	0.966013	0.0320529	0.00575731	2.6e-08	30.7679		rs150564454	G	A	0.988444	0.101751	0.00963178	4.4e-26	105.553		rs6016373	A	G	0.6266	0.0319	0.0036	1.00207e-17	142.496
rs34568880	T	C	0.013313	0.0560827	0.00908804	6.8e-10	2751.45		rs151235402	T	C	0.015827	0.0521833	0.00815144	1.5e-10	2376.58		rs633695	G	A	0.285	0.0433	0.0058	1.0539e-14	503.691
rs35511051	C	A	0.790015	0.0217862	0.00254546	1.1e-17	87.8331		rs17184382	A	C	0.574633	0.0219251	0.00201039	1.1e-27	180.43		rs646776	T	C	0.7876	0.1272	0.0042	4.77529e-187	1296.7
rs35882350	G	A	0.261067	0.0139684	0.00237417	4e-09	127.07		rs17326656	T	G	0.238472	0.0174394	0.00233365	7.8e-14	204.378		rs6504872	T	C	0.4723	0.025	0.0035	6.98715e-12	123.672
rs3780181	A	G	0.932373	0.0278983	0.00418323	2.6e-11	46.3812		rs174566	G	A	0.34974	0.0485019	0.00207982	2.8e-120	1353.38		rs6511720	G	T	0.90237	0.1851	0.0059	1e-200	1261.91
rs3822855	T	G	0.40166	0.0178418	0.00212447	4.5e-17	167.885		rs17585887	T	C	0.408926	0.0285849	0.00201656	1.3e-45	426.401		rs6544713	T	C	0.2942	0.0773	0.004	1.685e-81	1593.81
rs4148826	T	C	0.81955	0.0157917	0.0027233	6.7e-09	39.6528		rs1760801	G	A	0.704232	0.0202981	0.00218442	1.5e-20	107.511		rs6573778	T	C	0.471	0.0263	0.0039	2.95801e-11	137.215
rs4263041	A	G	0.716791	0.0699797	0.00251019	4.9e-171	1225.4		rs1801689	A	C	0.969457	0.06613	0.00577722	2.4e-30	117.844		rs6603981	T	C	0.8061	0.0351	0.0043	7.84513e-15	89.5603
rs4307732	A	G	0.105876	0.0448315	0.0033985	9.8e-40	1589.09		rs1835346	A	G	0.976126	0.0391877	0.00654659	2.2e-09	32.34		rs6709904	A	G	0.8865	0.0545	0.0083	8.39499e-10	126.415
rs438568	G	A	0.609246	0.0124777	0.00213986	5.5e-09	53.61		rs186696265	C	T	0.985307	0.104318	0.00828522	2.4e-36	141.075		rs6818397	T	G	0.4129	0.0254	0.0039	9.51043e-11	142.045
rs440677	G	A	0.376937	0.0159238	0.00215434	1.5e-13	139.246		rs188247550	C	T	0.986883	0.134286	0.00913128	5.9e-49	208.73		rs6882076	C	T	0.6662	0.0508	0.0037	5.35427e-41	323.354
rs4666384	A	G	0.321086	0.016633	0.00224003	1.1e-13	165.554		rs193735	A	G	0.036665	0.0329807	0.00529922	4.9e-10	926.172		rs7412	C	T	0.93404	0.3736	0.0096	1e-200	3514.65
rs472495	T	G	0.648959	0.0425743	0.00218093	7.3e-85	561.34		rs2043085	T	C	0.387816	0.0308028	0.00204157	1.9e-51	512.921		rs7551981	T	G	0.595	0.0358	0.0037	7.49722e-22	194.71
rs4738684	A	G	0.335348	0.0315439	0.00220937	3e-46	583.472		rs2068888	G	A	0.549268	0.0318216	0.00199589	3.2e-57	402.942		rs75687619	T	G	0.02375	0.1592	0.0153	3.60911e-22	9754.49
rs4930163	A	G	0.159456	0.0174597	0.00285203	9.2e-10	225.88		rs2070341	T	C	0.60309	0.0113012	0.00203413	2.8e-08	44.7166		rs7616006	A	G	0.5554	0.0315	0.0036	8.40621e-17	165.459
rs4970834	C	T	0.813358	0.105303	0.00268179	1e-200	1831.1		rs2081687	T	C	0.336799	0.0261379	0.00209126	7.6e-36	400.003		rs7640978	C	T	0.8945	0.0376	0.0066	1.65798e-08	55.908
rs556107	T	C	0.523338	0.0351712	0.00208846	1.2e-63	520.137		rs2092203	T	C	0.481154	0.0136756	0.00199323	6.8e-12	85.605		rs7832643	T	G	0.405	0.0289	0.0037	3.12104e-13	186.406
rs55637835	C	T	0.879119	0.0187129	0.00324835	8.4e-09	37.299		rs2131311	A	G	0.285364	0.0124181	0.00222753	2.5e-08	97.2242		rs8103315	A	C	0.1359	0.0422	0.0055	5.94155e-15	578.421
rs55714927	C	T	0.809636	0.0264314	0.00265551	2.4e-23	117.209		rs2131919	G	A	0.164266	0.0173511	0.00268396	1e-10	222.036		rs9306897	T	C	0.3034	0.0488	0.0037	7.5145e-37	623.71
rs55831924	T	C	0.361448	0.0156761	0.0021829	6.9e-13	138.302		rs213494	T	C	0.648345	0.0156106	0.00207578	5.5e-14	75.5986		rs9376090	T	C	0.7282	0.0254	0.004	2.59502e-09	65.7333
rs56236159	G	T	0.13149	0.0177139	0.00307979	8.8e-09	240.248		rs2137557	C	T	0.645612	0.0117624	0.00208003	1.6e-08	43.2511		rs9391858	G	A	0.1939	0.0495	0.005	7.20444e-22	743.078
rs6031587	C	T	0.928037	0.0256479	0.00413761	5.7e-10	41.7133		rs2187114	G	A	0.898976	0.0185151	0.00330375	2.1e-08	30.5485
rs60612724	G	A	0.038647	0.0323852	0.00541912	2.3e-09	890.17		rs2240466	G	A	0.877084	0.122769	0.00301848	1e-200	1640.14
rs6074012	C	T	0.523914	0.0116537	0.00208962	2.4e-08	56.9757		rs2240533	T	C	0.690102	0.0129897	0.00215234	1.6e-09	46.126
rs61003864	C	T	0.187128	0.0155966	0.00267616	5.6e-09	174.291		rs2244278	C	A	0.879447	0.0269912	0.00306133	1.2e-18	77.4787
rs61988556	T	C	0.913858	0.0224158	0.00372109	1.7e-09	38.1401		rs2304969	G	T	0.855068	0.0161469	0.0028501	1.5e-08	33.3318
rs6475606	C	T	0.51553	0.0202689	0.00208367	2.3e-22	175.437		rs2305746	G	A	0.933319	0.0282544	0.0039744	1.2e-12	46.9574
rs6544713	T	C	0.323136	0.0537152	0.00222274	5e-129	1727.49		rs2382825	C	T	0.377046	0.0134774	0.00204919	4.8e-11	99.8274
rs6560499	G	A	0.423993	0.0122028	0.00212189	8.9e-09	75.586		rs2407278	A	G	0.969846	0.0339449	0.00581961	5.4e-09	30.6484
rs6602912	G	T	0.284854	0.0221997	0.00231001	7.2e-22	310.753		rs2487294	T	G	0.723477	0.0183191	0.00222084	1.6e-16	81.866
rs6667939	T	C	0.71867	0.0153061	0.00232969	5e-11	58.0795		rs2699805	G	A	0.600328	0.0201313	0.00203748	5.1e-23	142.913
rs6680227	G	A	0.964763	0.0746581	0.00563322	4.3e-40	173.119		rs275184	T	G	0.837949	0.0173487	0.00275263	2.9e-10	43.0241
rs6709904	A	G	0.887415	0.043441	0.00329601	1.1e-39	187.277		rs2773469	A	G	0.266714	0.0188717	0.00225426	5.7e-17	230.465
rs6874202	C	T	0.634269	0.032331	0.00216292	1.6e-50	337.095		rs278981	C	T	0.758155	0.0125871	0.00229058	3.9e-08	33.7991
rs7108486	T	C	0.976279	0.0386029	0.00692024	2.4e-08	31.1475		rs28577186	G	A	0.335429	0.0163428	0.00211672	1.2e-14	156.614
rs71311871	A	G	0.916948	0.0283073	0.00378458	7.5e-14	58.6442		rs2983896	A	G	0.21474	0.0137912	0.00242177	1.2e-08	131.774
rs7202323	T	G	0.770259	0.0255365	0.00247732	6.5e-25	132.042		rs308	T	G	0.979403	0.159413	0.00698442	2.6e-115	462.157
rs7241918	T	G	0.82411	0.0157471	0.00274939	1e-08	38.4327		rs3103310	G	A	0.241785	0.0202549	0.00236652	1.1e-17	274.54
rs72911393	C	T	0.852382	0.0182619	0.00294119	5.3e-10	43.3805		rs320369	A	G	0.316708	0.0125327	0.00214567	5.2e-09	94.683
rs7569317	C	T	0.530638	0.017881	0.00208232	8.9e-18	132.264		rs326222	C	T	0.697957	0.0252203	0.00215698	1.4e-31	169.519
rs76468627	C	T	0.92413	0.0217346	0.00394926	3.7e-08	31.5809		rs343	C	A	0.916871	0.141493	0.00361052	1e-200	1472.83
rs7734476	A	G	0.550077	0.0187595	0.00209401	3.3e-19	139.553		rs34682685	A	G	0.104198	0.0337428	0.00326987	5.8e-25	901.456
rs7746081	G	A	0.695887	0.0234725	0.00226701	4e-25	147.679		rs35763453	C	T	0.058647	0.02845	0.00435137	6.2e-11	673.074
rs77542162	G	A	0.022495	0.128484	0.0070401	2.1e-74	14692.1		rs36043408	G	A	0.497847	0.0128072	0.00198554	1.1e-10	72.6607
rs7776054	A	G	0.738687	0.0162316	0.00237493	8.2e-12	60.6686		rs3731696	G	A	0.121188	0.0218939	0.00303176	5.1e-13	371.87
rs77960347	G	A	0.013351	0.0706209	0.00908667	7.7e-15	4378.7		rs3758413	C	T	0.417724	0.0111232	0.00201767	3.5e-08	63.5527
rs79220007	T	C	0.923865	0.057338	0.00392142	2e-48	220.652		rs3775228	T	C	0.399717	0.0338197	0.00203602	5.8e-62	606.423
rs79828839	T	C	0.198784	0.0144987	0.00261498	2.9e-08	148.448		rs3820897	C	T	0.819861	0.0197269	0.00260304	3.5e-14	61.84
rs869412	T	C	0.774316	0.0142314	0.00250093	1.3e-08	40.2769		rs3974807	T	C	0.189267	0.0159776	0.00253125	2.8e-10	182.627
rs880315	T	C	0.65976	0.0152225	0.00220678	5.3e-12	69.4778		rs4128205	C	A	0.509173	0.0115011	0.00199472	8.1e-09	57.2726
rs9289196	C	T	0.173786	0.0173702	0.00275673	3e-10	219.755		rs4134963	C	T	0.810122	0.0189544	0.00254235	9e-14	60.1779
rs934197	A	G	0.33544	0.0832348	0.00220298	1e-200	4094.32		rs41785	C	A	0.582513	0.0150445	0.00201492	8.2e-14	83.3612
rs9471968	A	G	0.454304	0.0116148	0.00209345	2.9e-08	64.8722		rs4253750	C	T	0.214455	0.0177576	0.00243701	3.2e-13	218.594
rs960596	T	C	0.33932	0.0135068	0.00221758	1.1e-09	106.224		rs4471666	T	G	0.930512	0.022461	0.00396699	1.5e-08	30.923
rs9834932	A	G	0.91117	0.0322172	0.00366408	1.5e-18	81.2523		rs4675812	G	A	0.412118	0.0142305	0.00201176	1.5e-12	105.031
rs9884390	C	T	0.234121	0.0251489	0.00249163	5.9e-24	427.208		rs4761234	T	C	0.515635	0.0140236	0.00199376	2e-12	84.0346
rs9894946	A	G	0.158888	0.0173333	0.00290132	2.3e-09	222.77		rs480823	C	T	0.078996	0.15572	0.00371974	1e-200	20619.5
									rs483082	T	G	0.23535	0.0862119	0.00234474	1e-200	5070.43
									rs483808	C	T	0.298027	0.0136636	0.00218517	4e-10	115.624
									rs4969179	T	G	0.39555	0.0177529	0.00203649	2.8e-18	168.092
									rs56397607	G	A	0.182538	0.0174851	0.00257608	1.1e-11	220.549
									rs58542926	C	T	0.925392	0.103184	0.00378074	5.3e-164	701.753
									rs6028716	G	A	0.741572	0.0128217	0.00228302	2e-08	37.4758
									rs6073958	C	T	0.198674	0.0556952	0.00249344	1.6e-110	2203.4
									rs61729990	C	A	0.982112	0.0558488	0.00752135	1.1e-13	49.2177
									rs61830291	C	A	0.095791	0.0287484	0.00337913	1.8e-17	660.129
									rs61905078	C	A	0.073841	0.199898	0.00379494	1e-200	35251.9
									rs61993685	T	C	0.923587	0.0234087	0.00373997	3.9e-10	36.9353
									rs62128802	C	T	0.816784	0.0158746	0.00257782	7.4e-10	40.7279
									rs62274099	T	C	0.424205	0.0120882	0.00202424	2.3e-09	74.2246
									rs62427982	C	T	0.67783	0.0133153	0.00213196	4.2e-10	50.3872
									rs62473520	T	C	0.922002	0.0211003	0.00380118	2.8e-08	30.6319
									rs6432622	A	G	0.509736	0.0108868	0.00198007	3.8e-08	51.2583
									rs6506033	C	T	0.927477	0.0228948	0.00383903	2.5e-09	33.5325
									rs6532798	T	C	0.697405	0.013792	0.00216353	1.8e-10	50.775
									rs6562773	A	G	0.452467	0.0120538	0.00201057	2e-09	70.1796
									rs6572807	G	A	0.267065	0.0124759	0.00224899	2.9e-08	100.645
									rs676210	G	A	0.794707	0.0735169	0.00244968	7.1e-198	980.837
									rs6792725	A	G	0.307596	0.0152543	0.00221886	6.2e-12	142.157
									rs67981690	G	A	0.129887	0.0299225	0.00297454	8.3e-24	688.227
									rs6805924	T	G	0.430548	0.0109684	0.00200571	4.5e-08	60.4347
									rs6882076	C	T	0.634285	0.0331011	0.00206122	4.9e-58	353.72
									rs696825	C	T	0.747074	0.0202838	0.00228763	7.5e-19	91.8049
									rs698927	A	C	0.816215	0.0183059	0.00256302	9.2e-13	54.3287
									rs7077812	C	T	0.194911	0.0142284	0.00250611	1.4e-08	143.807
									rs7135509	T	C	0.706804	0.0121338	0.00221197	4.1e-08	38.0779
									rs7140110	C	T	0.298338	0.0283172	0.00217811	1.2e-38	496.822
									rs7215055	G	A	0.062892	0.0389233	0.00410062	2.3e-21	1255.82
									rs7244	A	G	0.174166	0.0151978	0.00261808	6.4e-09	168.307
									rs72555385	G	A	0.048975	0.0653776	0.0046178	1.7e-45	3614.75
									rs72603744	A	C	0.684377	0.0125232	0.00213684	4.6e-09	43.6642
									rs72644085	T	C	0.853964	0.0196036	0.00281241	3.2e-12	49.5067
									rs72784786	A	G	0.060638	0.0263468	0.00416714	2.6e-10	575.889
									rs72801474	G	A	0.908157	0.0307938	0.00344154	3.6e-19	76.8301
									rs73025562	A	G	0.245879	0.0138633	0.00231292	2e-09	127.874
									rs7308584	A	G	0.184436	0.0149992	0.00256911	5.3e-09	161.896
									rs7400002	G	A	0.230609	0.0139701	0.00236663	3.6e-09	132.483
									rs74090351	G	A	0.931857	0.0250097	0.00393658	2.1e-10	37.5975
									rs7424120	C	T	0.398276	0.0123561	0.00203065	1.2e-09	81.0445
									rs75268115	A	G	0.915301	0.0207435	0.0035798	6.8e-09	32.1483
									rs75609851	G	A	0.98952	0.199116	0.0100401	1.6e-87	366.79
									rs75721796	A	G	0.214459	0.0210491	0.00245993	1.2e-17	307.2
									rs77009508	G	A	0.073734	0.0450912	0.00379997	1.8e-32	1667.41
									rs7704653	G	A	0.723029	0.0157533	0.00224582	2.3e-12	60.6346
									rs7714361	C	A	0.233667	0.0138858	0.00236622	4.4e-09	130.368
									rs7786339	T	C	0.168936	0.016328	0.00265352	7.6e-10	195.513
									rs78058190	A	G	0.05045	0.0816071	0.00510649	1.7e-57	5649.17
									rs7847285	T	C	0.410787	0.0116104	0.00202626	1e-08	70.0679
									rs78484485	G	A	0.945984	0.0758529	0.00439863	1.2e-66	274.296
									rs78588343	G	A	0.823784	0.0155231	0.0026035	2.5e-09	37.4561
									rs7861679	T	C	0.696815	0.0122025	0.00216741	1.8e-08	39.8224
									rs79153732	T	C	0.017389	0.0773626	0.00758596	2e-24	5248.87
									rs79287178	A	G	0.031151	0.0500946	0.00600435	7.2e-17	2154.96
									rs79357714	A	G	0.954276	0.0289463	0.00476453	1.2e-09	33.7946
									rs80276949	A	G	0.022677	0.0457563	0.00669008	8e-12	1812.19
									rs8102873	T	C	0.584919	0.0123302	0.00201474	9.4e-10	55.6687
									rs8126001	C	T	0.510424	0.0163778	0.00199681	2.4e-16	115.859
									rs867939	G	A	0.42379	0.0136048	0.00202516	1.8e-11	94.0895
									rs880315	T	C	0.659789	0.011772	0.00210497	2.2e-08	41.5885
									rs9376511	A	G	0.796712	0.0154993	0.00246511	3.2e-10	43.0786
									rs9425589	G	A	0.433219	0.0137618	0.00200182	6.2e-12	94.6983
									rs9436661	T	G	0.647081	0.0777322	0.00207793	1e-200	1888.93
									rs9561643	C	A	0.314726	0.0167149	0.00214481	6.5e-15	168.936
									rs9889402	A	G	0.728192	0.0122827	0.00222926	3.6e-08	36.1717
									rs9902027	C	T	0.22563	0.0151609	0.00238645	2.1e-10	157.049

## Sheet: Table S3
Table S3. Association of genetically proxied lipids with risk of Rotator cuff syndrome
Exposure	Outcome	Methods	SNP	Beta	SE	OR(95%CI)	P value
LDL-C	Rotator cuff syndrome	MR Egger	100	-0.0716907	0.0512824	0.93 (0.84 , 1.03)	0.165281
		Weighted median	100	-0.0133389	0.0581339	0.99 (0.88 , 1.11)	0.818519
		Inverse variance weighted	100	-0.031966	0.0355276	0.97 (0.90 , 1.04)	0.368252
		Simple mode	100	0.0456405	0.10715	1.05 (0.85 , 1.29)	0.671068
		Weighted mode	100	-0.0388861	0.0484528	0.96 (0.88 ,1.06)	0.424154
TG	Rotator cuff syndrome	MR Egger	152	-0.0068935	0.0403238	0.99 (0.92 , 1.08)	0.864491
		Weighted median	152	0.0102594	0.045358	1.01 (0.92 , 1.10)	0.821056
		Inverse variance weighted	152	0.0352913	0.0291434	1.04 (0.98 , 1.10)	0.225914
		Simple mode	152	0.0230467	0.0874404	1.02 (0.86 , 1.22)	0.79247
		Weighted mode	152	0.0122461	0.0363639	1.01 (0.94 , 1.09)	0.736761
TC	Rotator cuff syndrome	MR Egger	64	-0.0672245	0.0388383	0.94 (0.87 , 1.01)	0.0884469
		Weighted median	64	-0.0276217	0.0389989	0.97 (0.90 , 1.05)	0.478778
		Inverse variance weighted	64	-0.0307645	0.0254418	0.97 (0.92 , 1.02)	0.226582
		Simple mode	64	-0.00302701	0.0724051	1.00 (0.87 , 1.15)	0.966785
		Weighted mode	64	-0.0307805	0.0387115	0.97 (0.90 , 1.05)	0.429526

## Sheet: Table S4
Table S4. Heterogeneity and pleiotropy tests of lipid instrument effects
Exposure	Outcome	SNP	P value for Cochran Q test	P value for MR-Egger heterogeneity	P value for MR-Egger intercept	MR-PRESSO result Global Test
LDL-C	Rotator cuff syndrome	100	0.989251	0.990044	0.285389	0.56
TG	Rotator cuff syndrome	152	0.996119	0.99717	0.132208	0.3
TC	Rotator cuff syndrome	64	0.871714	0.885343	0.218744	0.38

## Sheet: Table S5
Table S5. Lipid-lowering drug classes, target genes and substances
Lipid regulation	Gene	Full name of the gene	Drug target	Chromosome	Base pair(GRCh37)	Mechanism of action	SNP	Examples of drugs
LDL-C decreasing	HMGCR	3-hydroxy-3-methylglutaryl-coenzyme A reductase	HMG-CoA reductase	5	74632993-74657941	inhibition	14	Statins
	PCSK9	proprotein convertase subtilisin kexin type 9	Proprotein convertase subtilisin/kexin type 9	1	55505221-55530525	inhibition	27	Evolocumab
	ABCG5	ATP binding cassette subfamily G member 5	ATP Binding Cassette Subfamily G Member 5	2	44039611-44065978	enhancement	17	Colestipol
	APOB	apolipoprotein B	Apolipoprotein B-100	2	21224301-21266945	inhibition	23	Mipomersen
	NPC1L1	Niemann-Pick C1 like intracellular cholesterol transporter 1	Niemann-Pick C1-like protein 1	7	44552134-44580929	inhibition	5	Ezetimibe
	LDLR	low-density lipoprotein receptor	LDL Receptora	19	11200139 -11244496	inhibition	37	/
TG decreasing	ANGPTL3	angiopoietin-like 3	Angiopoietin-related protein 3	1	63063191-63071984	inhibition	16	Evinacumab
	LPL	lipoprotein lipase	Lipoprotein Lipase	8	19796764-19824770	enhancement	41	Ibrolipim
	APOC3	apolipoprotein C3	Apolipoprotein C-III	11	116700623-116703788	inhibition	30	Volanesorsen
	PPARA	peroxisome proliferator-activated receptor alpha	Peroxisome proliferator-activated receptor-a	22	46546429-46639653	enhancement	2	Fenofibrate

## Sheet: Table S6
Table S6. Characteristics of lipid-lowering genetics variants in target genes
Pharmacological mechanism	Gene	SNP	Effect allele	Other allele	Effect allele frequency	Beta	Se	P value	F
LDL-C reducing	HMGCR	rs75240579	T	C	0.048363	-0.0372115	0.00487202	2.19989e-14	1164.1
		rs17648288	G	C	0.093345	0.0466492	0.00358564	1.10002e-38	1745.29
		rs2006760	G	C	0.205486	0.03556	0.00261075	2.99985e-42	886.99
		rs61303403	T	G	0.11157	0.0564767	0.00331551	4.60045e-65	2511.02
		rs141642272	C	G	0.026705	0.0532822	0.00653971	3.69999e-16	2448.14
		rs9791146	T	C	0.085824	0.0332796	0.00372202	3.80014e-19	893.895
		rs111353455	A	G	0.085844	0.0243909	0.00372718	6.00067e-11	479.699
		rs116153450	A	C	0.04623	-0.0303618	0.00499242	1.2e-09	776.039
		rs12916	C	T	0.400537	0.0621175	0.00212705	1.69824e-187	2047.5
		rs80324692	T	C	0.081157	-0.0260509	0.00385694	1.39991e-11	550.109
		rs62366598	T	C	0.069698	-0.0265721	0.00409626	8.80035e-11	579.518
		rs115845757	A	G	0.019	0.048608	0.00785612	6.1e-10	2051.74
		rs35122945	C	A	0.067368	-0.0281057	0.00423755	3.29989e-11	650.069
		rs4703665	C	T	0.848709	0.0244938	0.00297742	1.9002e-16	79.9879
	PCSK9	rs6691964	A	G	0.092472	-0.0234719	0.00358388	5.79963e-11	440.972
		rs556369867	T	C	0.330585	0.0175746	0.00243048	4.79954e-13	182.249
		rs182491400	T	C	0.025416	0.0513354	0.00719168	9.49948e-13	2274.63
		rs72909541	T	C	0.046097	-0.0334061	0.00501479	2.70023e-11	939.943
		rs45508296	G	A	0.016402	-0.0494089	0.00842303	4.49997e-09	2125.88
		rs150119739	A	G	0.045318	0.0452728	0.00520209	3.19963e-18	1730.84
		rs7525503	T	G	0.02036	0.0454642	0.0075822	2e-09	1791.38
		rs10493176	G	T	0.07579	-0.0531381	0.00394676	2.60016e-41	2311.4
		rs200730299	C	A	0.195034	-0.0543492	0.00278155	5.10035e-85	2105.01
		rs17111503	G	A	0.268141	0.0406795	0.00235743	1e-66	1069.68
		rs7546522	T	C	0.155442	-0.0168117	0.00295297	1.2e-08	210.417
		rs79396670	A	G	0.035496	-0.0336489	0.00562029	2.1e-09	964.308
		rs146273942	A	G	0.023188	-0.0538858	0.00722418	8.69961e-14	2513.34
		rs2479420	T	C	0.73803	-0.0283879	0.0023826	9.8992e-33	186.089
		rs11810371	A	G	0.043743	-0.0294547	0.00507333	6.4e-09	732.193
		rs11591147	T	G	0.017468	-0.348456	0.00793088	0	138055
		rs11206513	T	C	0.600617	0.0316517	0.0021463	3.19963e-49	352.819
		rs572512	T	C	0.366257	0.0135743	0.00221339	8.60003e-10	102.913
		rs11206517	G	T	0.033149	0.0680285	0.00580615	1e-31	3978.01
		rs11580527	A	G	0.011127	-0.126003	0.0103606	5.00035e-34	14281.6
		rs2495517	G	A	0.794271	0.0177548	0.0025792	5.79963e-12	57.1483
		rs77875082	A	G	0.032388	0.0481535	0.00605559	1.80011e-15	1985.78
		rs41294821	T	C	0.022807	-0.0386615	0.00705365	4.20001e-08	1290.71
		rs472495	T	G	0.648959	0.0425743	0.00218093	7.29962e-85	561.34
		rs12739979	T	C	0.246521	-0.0202563	0.00254032	1.50003e-15	272.571
		rs72660548	G	C	0.018458	0.0509816	0.00777535	5.50047e-11	2259.32
		rs45613943	C	T	0.048725	-0.0340702	0.0048672	2.60016e-12	975.07
	ABCG5	rs139029940	A	C	0.149793	0.023052	0.0029703	8.4004e-15	398.433
		rs75331444	A	G	0.065626	-0.0991016	0.0042053	8.60994e-123	8236.58
		rs7590687	C	T	0.923041	-0.0466276	0.00400593	2.60016e-31	147.473
		rs59867553	T	C	0.140592	0.0192904	0.0030037	1.29999e-10	281.955
		rs13427362	G	A	0.069877	-0.0406493	0.00409378	3.10027e-23	1358.33
		rs576115488	G	T	0.010006	-0.0883053	0.0125314	1.80011e-12	6908.5
		rs6544713	C	T	0.676864	-0.0537152	0.00222274	5.00035e-129	823.02
		rs17424122	A	T	0.06197	0.0432792	0.00440787	9.3994e-23	1553.55
		rs72798839	T	C	0.048328	0.0347481	0.00484782	7.59976e-13	1014.77
		rs113140405	T	C	0.017339	-0.0540711	0.00863321	3.79997e-10	2545.99
		rs4549146	C	T	0.448266	-0.0287298	0.00209558	8.9002e-43	401.616
		rs140488605	T	C	0.04897	0.0490825	0.00509965	6.29941e-22	2027.97
		rs72796772	T	C	0.043263	-0.0359316	0.00525162	7.8001e-12	1091.04
		rs4953027	G	A	0.744955	-0.0165085	0.00238761	4.70002e-12	61.2509
		rs142761319	T	G	0.011085	-0.0637139	0.0102737	5.60003e-10	3565.73
		rs77673991	T	C	0.017381	-0.104551	0.00800801	5.90065e-39	9671.48
		rs7598542	C	G	0.210257	-0.0489328	0.00256145	2.39994e-81	1672.44
	APOB	rs4076525	C	T	0.746713	-0.0505289	0.00240849	1e-97	570.525
		rs7557067	G	A	0.227783	-0.0527285	0.0024772	1.50003e-100	1899.85
		rs72653066	G	C	0.011361	-0.0729131	0.00986922	1.50003e-13	4680.14
		rs562338	G	A	0.819427	0.101683	0.00270192	6.09536999999999e-310	1651.18
		rs72782175	C	T	0.012867	-0.0816866	0.00923295	8.99912e-19	5881.08
		rs137978266	G	A	0.011587	0.0709235	0.0100731	1.9002e-12	4424.65
		rs12691202	T	C	0.039135	-0.1003	0.00536319	4.79954e-78	8684.86
		rs579826	C	T	0.91832	0.0748055	0.00379452	1.59993e-86	403.088
		rs934197	A	G	0.33544	0.0832348	0.00220298	2.19785999999997e-312	4094.32
		rs17398765	G	A	0.07479	0.069062	0.0040333	1e-65	3922.73
		rs1317821	T	C	0.25754	0.0486294	0.00238484	1.99986e-92	1552.45
		rs62122482	T	C	0.045379	0.0565691	0.00503995	3.10027e-29	2708.14
		rs72902590	A	G	0.044841	-0.0804294	0.00502529	1.20005e-57	5512.21
		rs377122620	G	T	0.112914	0.0795386	0.00374364	3.59998e-100	5000.85
		rs74522352	T	C	0.018497	-0.0728636	0.00774529	5.10035e-21	4639.63
		rs1042023	C	G	0.010503	0.0981243	0.0104207	4.70002e-21	8557.42
		rs6756743	T	C	0.047286	0.046023	0.00493809	1.20005e-20	1785.21
		rs80169634	A	G	0.047204	-0.0284073	0.0048627	5.19996e-09	678.498
		rs79106033	T	C	0.025982	-0.0383626	0.00653135	4.30002e-09	1266.63
		rs4665709	A	G	0.19872	-0.0487348	0.00260358	3.50026e-78	1683.21
		rs533617	C	T	0.039479	-0.115228	0.00533769	2.30144e-103	11530.9
		rs540156	T	C	0.140353	-0.0283419	0.00304812	1.39991e-20	609.254
		rs113588790	T	C	0.040286	0.0748127	0.00529784	2.80027e-45	4784.14
	NPC1L1	rs217399	T	C	0.443739	-0.0213142	0.00211012	5.50047e-24	222.77
		rs73107478	C	A	0.079159	0.0259282	0.00392582	4.00037e-11	546.12
		rs11769798	G	C	0.203247	0.0146951	0.00259509	1.5e-08	151.649
		rs2073547	G	A	0.184007	0.0355498	0.00267287	2.29985e-40	910.495
		rs2008036	T	G	0.125862	0.0193599	0.00315721	8.70001e-10	288.862
	LDLR	rs2421198	T	C	0.232896	-0.0134092	0.00245241	4.60002e-08	121.563
		rs379309	T	C	0.501714	-0.0189721	0.00206993	4.90004e-20	158.083
		rs12983316	G	A	0.16066	0.0332795	0.00282245	4.30031e-32	820.578
		rs3786721	C	T	0.557713	-0.0305197	0.00208477	1.59993e-48	363.281
		rs73013176	C	T	0.011456	-0.17308	0.00989319	1.59993e-68	27734.8
		rs10420325	T	A	0.639284	-0.0165393	0.00235425	2.09991e-12	86.9572
		rs12052200	A	G	0.321898	-0.0526399	0.00223552	1.30017e-122	1661.81
		rs36049922	C	T	0.040127	0.0360512	0.00527004	7.89951e-12	1101.94
		rs143020224	G	C	0.118603	-0.168952	0.00320833	0	23342.1
		rs11557092	C	T	0.735703	0.0141311	0.0023743	2.69998e-09	46.5061
		rs62129138	A	G	0.158145	0.0325893	0.00285281	3.19963e-30	789.196
		rs140181075	T	C	0.037619	0.0455464	0.00547214	8.60003e-17	1766.09
		rs76213248	T	C	0.410251	-0.0572931	0.00211261	5.79429e-162	1712.29
		rs117819913	A	T	0.07124	0.0239223	0.0040324	2.99999e-09	468.804
		rs73013166	C	T	0.066524	-0.0889437	0.00415804	1.59956e-101	6604.13
		rs144624209	A	G	0.064106	-0.0437918	0.00432384	4.19952e-24	1587.06
		rs4804564	T	C	0.927533	0.0265587	0.00399608	2.99985e-11	45.0421
		rs17242367	T	C	0.070321	0.0315779	0.00420565	6.00067e-14	818.325
		rs73015030	A	G	0.036317	-0.112139	0.00553933	4.00037e-91	10942.7
		rs2738447	C	A	0.592612	0.0422734	0.00211024	2.90001e-89	642.385
		rs116959285	G	C	0.045717	0.0681552	0.00524329	1.20005e-38	3940.6
		rs111731690	T	G	0.05169	0.029107	0.00481642	1.5e-09	709.029
		rs4804149	C	T	0.287226	0.0153178	0.00229125	2.29985e-11	147.404
		rs8101801	A	C	0.035559	-0.0450814	0.00559272	7.59976e-16	1733.79
		rs13345127	T	C	0.109899	0.0192288	0.00331813	6.80002e-09	290.168
		rs7249753	C	T	0.060112	0.0444212	0.00435394	1.9002e-24	1640.18
		rs17248748	T	C	0.015825	-0.0656844	0.00830137	2.49977e-15	3773.3
		rs6511721	A	G	0.519695	-0.0474014	0.00207343	1.09901e-115	952.924
		rs17249001	A	G	0.088845	0.0531066	0.00378972	1.29987e-44	2275.87
		rs2738464	C	G	0.87843	0.0257528	0.00317135	4.60045e-16	71.0503
		rs147540853	A	G	0.027789	-0.0710448	0.00631556	2.29985e-29	4366.45
		rs79668907	T	C	0.228499	-0.0704358	0.00264596	3.99945e-156	3398.45
		rs112159161	T	C	0.016621	-0.14759	0.00830891	1.39991e-70	19718.4
		rs141618758	C	T	0.024108	0.0450148	0.00694567	9.09913e-11	1749.26
		rs117339792	A	G	0.01984	-0.060965	0.00817716	8.99912e-14	3233.36
		rs146576912	T	C	0.060983	-0.107272	0.00482702	1.99986e-109	9730.94
		rs1433091	G	A	0.906073	-0.0201813	0.00367256	3.89996e-08	33.7087
TG reducing	ANGPTL3	rs7419069	C	G	0.936511	-0.0276676	0.00406731	1e-11	42.8713
		rs79152165	A	G	0.043406	0.042028	0.00502409	6.00067e-17	1495.4
		rs138783696	C	T	0.022275	-0.0535773	0.00687062	6.29941e-15	2489.47
		rs10458569	A	C	0.041375	-0.0520475	0.00498271	1.50003e-25	2302.47
		rs61775912	G	A	0.017879	-0.0669559	0.00777305	7.10068e-18	3918.03
		rs78942743	T	C	0.016888	0.0481747	0.00777719	5.89997e-10	2021.67
		rs61775882	C	T	0.107758	0.0289817	0.00328084	1e-18	662.011
		rs12749263	C	T	0.262393	0.0369329	0.0022715	1.9002e-59	889.222
		rs76272805	A	G	0.050876	-0.0495702	0.00451652	5.00035e-28	2066.7
		rs115436978	A	G	0.040313	0.0366026	0.00506378	4.90004e-13	1136.99
		rs17388017	T	A	0.0289	-0.0548745	0.00597021	3.90032e-20	2594.39
		rs1168042	T	A	0.647611	0.0775501	0.00207532	1.30017e-305	1877.22
		rs116423924	T	G	0.014449	-0.0666018	0.00849453	4.49987e-15	3889.99
		rs564992513	C	G	0.031435	0.0536714	0.00732586	2.39994e-13	2474.73
		rs80242442	C	T	0.090925	-0.0520683	0.00345506	2.49977e-51	2184.62
		rs12737254	G	A	0.05262	0.0290383	0.00445198	6.89922e-11	705.739
	LPL	rs28522810	T	C	0.499378	0.028373	0.00198231	1.80011e-46	355.757
		rs283	T	C	0.199272	0.0432872	0.0025137	1.9002e-66	1327.37
		rs74746426	T	A	0.041925	0.0476017	0.00511359	1.29987e-20	1923.17
		rs301	C	T	0.235525	-0.119337	0.00233085	0	9816.53
		rs9644636	G	T	0.27825	0.0445666	0.00223859	3.40017e-88	1268.05
		rs11781692	A	C	0.014572	0.0757662	0.0083203	8.49963e-20	5046.62
		rs74444445	C	T	0.023877	0.0720911	0.00674999	1.29987e-26	4520.43
		rs187544997	G	C	0.016545	0.0527234	0.00792251	2.80027e-11	2424.52
		rs144469617	A	G	0.016219	0.0518802	0.00786956	4.30031e-11	2347.96
		rs77312736	A	G	0.106044	0.0239806	0.00329184	3.19963e-13	453.906
		rs112122343	T	G	0.047313	-0.0622879	0.0047899	1.20005e-38	3284.46
		rs73600043	T	G	0.0225	-0.065242	0.00667819	1.50003e-22	3700.7
		rs147011441	A	G	0.024998	0.04264	0.00658846	9.70063e-11	1569.15
		rs117956669	G	T	0.011507	0.054454	0.00925949	4.09996e-09	2600.58
		rs7005359	G	A	0.187787	-0.0807776	0.00255354	1.30017e-219	4724.58
		rs118045108	T	C	0.023348	0.0477592	0.00654152	2.90001e-13	1973.68
		rs148383135	A	G	0.013042	-0.0875018	0.00891533	9.70063e-23	6767.52
		rs75240547	C	G	0.013054	-0.0772277	0.00874754	1.10002e-18	5253.71
		rs528159059	C	T	0.018674	0.154517	0.00734642	3.29989e-98	21681.6
		rs34761945	T	C	0.093687	0.0285317	0.0034706	1.99986e-16	651.716
		rs258	C	G	0.445568	-0.041846	0.00202078	2.90001e-95	857.993
		rs4922115	A	G	0.154854	-0.0467511	0.00273505	1.69981e-65	1635.33
		rs3289	C	T	0.027497	0.154168	0.00606855	2.30144e-142	21375.6
		rs4464984	T	C	0.28221	-0.092803	0.00220018	0	5520.87
		rs4557718	C	T	0.132042	0.0523227	0.00291856	7.19946e-72	2105.87
		rs11204079	G	A	0.78834	0.0493481	0.00246184	2.19989e-89	455.104
		rs140801028	G	C	0.013779	-0.0651127	0.00873024	8.80035e-14	3719.08
		rs1441771	T	C	0.185844	-0.0800018	0.00255287	1.39959e-215	4644.51
		rs268	G	A	0.018189	0.226897	0.00739462	9.28966e-207	49596.8
		rs308	G	T	0.020597	-0.159413	0.00698442	2.60016e-115	23102.9
		rs117910839	A	T	0.031406	-0.156954	0.00576245	2.30144e-163	22100.7
		rs6586870	A	G	0.397519	0.0235192	0.00204574	1.39991e-30	294.145
		rs4922108	C	T	0.15026	0.0178256	0.00276695	1.2e-10	238.283
		rs6586876	A	G	0.620386	-0.0260999	0.00204232	2.09991e-37	228.206
		rs148048657	A	G	0.025278	0.0377649	0.00666587	1.5e-08	1229.56
		rs343	A	C	0.083129	-0.141493	0.00361052	0	16807.6
		rs113831503	T	C	0.034267	-0.0399801	0.00544845	2.19989e-13	1365.75
		rs35465966	A	C	0.431344	-0.0794515	0.00200313	0	3189.09
		rs78358410	G	T	0.193271	-0.0901142	0.00250642	4.4978e-283	5854.98
		rs148754782	A	G	0.027908	-0.0531426	0.00603306	1.29987e-18	2434.82
		rs66462329	A	G	0.283325	-0.0807274	0.00219557	5.90201e-296	4158.37
	APOC3	rs61905084	C	T	0.180713	-0.0729835	0.00257629	1.49968e-176	3883.08
		rs180327	T	C	0.645279	-0.0937927	0.00207286	0	2769.67
		rs150233369	A	G	0.02459	-0.0566905	0.00652029	3.50026e-18	2782.42
		rs12802202	C	T	0.02272	-0.0462866	0.00681198	1.10002e-11	1854.54
		rs1076485	T	C	0.125112	0.0809294	0.00301055	3.59749e-159	5112.75
		rs12272004	A	C	0.07277	0.203448	0.00382018	0	36665.9
		rs1974718	A	G	0.931914	-0.245288	0.00393661	0	3643.06
		rs11216122	T	G	0.05143	-0.0425397	0.00448663	2.49977e-21	1519.27
		rs1268353	T	C	0.342494	-0.0688862	0.00209055	4.10204e-238	2769.27
		rs3087611	T	A	0.017798	-0.0751594	0.00753946	2.09991e-23	4948.77
		rs111732554	C	G	0.02099	-0.050457	0.00690954	2.80027e-13	2209.45
		rs113271699	A	C	0.014811	-0.0615155	0.00828196	1.10002e-13	3313.01
		rs35412484	C	T	0.176984	-0.0420515	0.00260213	9.60064e-59	1287.42
		rs75542613	A	G	0.068647	-0.0615272	0.00393819	5.10035e-55	3131.88
		rs12721078	A	C	0.031903	-0.0703707	0.00566642	2.09991e-35	4269.43
		rs112701434	C	T	0.045239	-0.0401412	0.00482736	9.09913e-17	1361.12
		rs4520	C	T	0.752996	-0.0996183	0.00232312	0	2172.7
		rs545274	T	C	0.220687	-0.045801	0.0023951	1.59993e-81	1446.66
		rs146092979	A	C	0.019597	-0.0404332	0.00727679	2.80001e-08	1418.27
		rs1473177	C	T	0.110588	0.0665803	0.00316654	3.80014e-98	3505.23
		rs525302	G	C	0.94523	-0.03697	0.00437194	2.80027e-17	66.0374
		rs74773964	C	T	0.019233	-0.0498568	0.00720256	4.49987e-12	2160.83
		rs3135507	T	C	0.024962	0.110289	0.00638576	7.8001e-67	10715.1
		rs4080140	A	G	0.018845	-0.0459859	0.00735965	4.09996e-10	1837.71
		rs11216164	A	G	0.336844	-0.0192737	0.00211403	7.70016e-20	217.392
		rs79610135	C	T	0.03647	-0.0342105	0.00529141	1e-10	996.892
		rs75919952	T	C	0.050151	-0.0970207	0.00456283	2.49977e-100	8029.77
		rs12721041	T	C	0.016054	0.185471	0.00788062	1.79887e-122	32022
		rs150555490	T	C	0.056868	-0.0384234	0.00427544	2.49977e-19	1231.57
		rs2070669	G	C	0.719431	-0.058874	0.0022287	8.89201e-154	859.44
	PPARA	rs6008191	G	A	0.218723	0.0178326	0.00243641	2.49977e-13	219.247
		rs6008598	T	C	0.107116	0.0221068	0.00323336	8.10028e-12	385.22

## Sheet: Table S7
Table S7. Association between genetically proxied targets of lipid-lowering drugs and the risk of Coronary heart disease(positive control)
Lipid modifying effect	Drug target gene	Outcome	Methods	SNP	Beta	Se	OR(95%CI)	P value
LDL-C reducing	HMGCR	Coronary heart disease	MR Egger	11	-0.738605	0.327731	0.48 (0.25 , 0.91)	0.0506966
			Weighted median	11	-0.511036	0.130659	0.60 (0.46 , 0.78)	9.18293e-05
			Inverse variance weighted	11	-0.517583	0.11443	0.60 (0.48 , 0.75)	6.09218e-06
			Simple mode	11	-0.311803	0.259787	0.73 (0.44 , 1.22)	0.257712
			Weighted mode	11	-0.511615	0.123862	0.60 (0.47 , 0.76)	0.00204244
	PCSK9	Coronary heart disease	MR Egger	22	-0.689349	0.148283	0.50 (0.38 , 0.67)	0.00015473
			Weighted median	22	-0.751377	0.123825	0.47 (0.37 , 0.60)	1.29457e-09
			Inverse variance weighted	22	-0.803907	0.0889683	0.49 (0.38 , 0.53)	1.62691e-19
			Simple mode	22	-0.738062	0.180028	0.48 (0.34 , 0.68)	0.000511951
			Weighted mode	22	-0.764644	0.122542	0.47 (0.37 , 0.59)	3.44554e-06
	ABCG5	Coronary heart disease	MR Egger	11	-1.34379	0.256592	0.26 (0.16 , 0.43)	0.00053686
			Weighted median	11	-1.00189	0.137102	0.37 (0.28 , 0.48)	2.71941e-13
			Inverse variance weighted	11	-0.910915	0.101939	0.40 (0.33 , 0.49)	4.03942e-19
			Simple mode	11	-0.586097	0.215038	0.56 (0.37 , 0.85)	0.0213557
			Weighted mode	11	-1.0459	0.146242	0.35 (0.26 , 0.47)	3.09803e-05
	APOB	Coronary heart disease	MR Egger	16	-0.391001	0.221005	0.68 (0.44 , 1.04)	0.0986318
			Weighted median	16	-0.472993	0.102211	0.62 (0.51 , 0.76)	3.69948e-06
			Inverse variance weighted	16	-0.503614	0.0722466	0.60 (0.53 , 0.70)	3.15204e-12
			Simple mode	16	-0.35747	0.166316	0.70 (0.51 , 0.97)	0.0483353
			Weighted mode	16	-0.426229	0.110704	0.65 (0.53 , 0.81)	0.00157333
	NPC1L1	Coronary heart disease	MR Egger	5	-0.432099	1.38128	0.65 (0.04 , 7.73)	0.774899
			Weighted median	5	-0.564855	0.304829	0.57 (0.31 , 1.03)	0.063879
			Inverse variance weighted	5	-0.307204	0.368903	0.74 (0.34 , 1.52)	0.404986
			Simple mode	5	-0.662777	0.513584	0.52 (0.19 , 1.41)	0.266422
			Weighted mode	5	-0.605967	0.352694	0.55 (0.27 , 1.09)	0.160906
	LDLR	Coronary heart disease	MR Egger	22	-0.84498	0.192617	0.43 (0.30 , 0.63)	0.000284826
			Weighted median	22	-0.842691	0.107433	0.43 (0.35 , 0.53)	4.36776e-15
			Inverse variance weighted	22	-0.907595	0.0797445	0.40 (0.35 , 0.47)	5.18343e-30
			Simple mode	22	-0.822717	0.15279	0.44 (0.33 , 0.60)	2.43107e-05
			Weighted mode	22	-0.822717	0.118251	0.44 (0.35 , 0.55)	7.15676e-07
TG reducing	ANGPTL3	Coronary heart disease	MR Egger	14	0.0223304	0.282062	1.02 (0.59 , 1.78)	0.938203
			Weighted median	14	-0.111561	0.119268	0.89 (0.71 , 1.13)	0.349591
			Inverse variance weighted	14	-0.0740468	0.094474	0.93 (0.77 , 1.12)	0.433169
			Simple mode	14	0.381537	0.263611	1.46 (0.87 , 2.46)	0.171482
			Weighted mode	14	-0.130687	0.11794	0.88 (0.70 , 1.11)	0.287909
	LPL	Coronary heart disease	MR Egger	23	-0.362959	0.106427	0.77 (0.66 , 0.91)	0.00263296
			Weighted median	23	-0.337651	0.0645633	0.70 (0.62 , 0.78)	1.69719e-07
			Inverse variance weighted	23	-0.294863	0.0490913	0.66 (0.61 , 0.72)	1.89676e-09
			Simple mode	23	-0.298425	0.0904004	0.62 (0.53 , 0.74)	0.00325324
			Weighted mode	23	-0.322139	0.0567659	0.69 (0.61 , 0.78)	1.04592e-05
	APOC3	Coronary heart disease	MR Egger	26	-0.159001	0.0664902	0.85 (0.75 , 0.97)	0.0249785
			Weighted median	26	-0.21393	0.0487061	0.81 (0.73 , 0.89)	1.12182e-05
			Inverse variance weighted	26	-0.234466	0.0347017	0.79 (0.74 , 0.85)	1.41251e-11
			Simple mode	26	-0.249816	0.0819841	0.78 (0.66 , 0.92)	0.00539013
			Weighted mode	26	-0.209709	0.0431597	0.81 (0.75 , 0.88)	5.37082e-05
	PPARA	Coronary heart disease	Inverse variance weighted	2	-1.39646	0.18773	0.25 (0.17 , 0.36)	1.0172e-13

## Sheet: Table S8
Table S8. Heterogeneity and pleiotropy tests of instrument effects (positive control)
Drug target gene	Outcome	SNP	P value for Cochran Q test	P value for MR-Egger heterogeneity	P value for MR-Egger intercept	MR-PRESSO result Global Test
HMGCR	Coronary heart disease	11	0.875459	0.858843	0.48998	0.89
PCSK9	Coronary heart disease	22	0.915579	0.920675	0.345728	0.78
ABCG5	Coronary heart disease	11	0.437362	0.672609	0.0992758	0.09
APOB	Coronary heart disease	16	0.63379	0.582132	0.598237	0.63
NPC1L1	Coronary heart disease	5	0.0487479	0.0231149	0.930277	0.45
LDLR	Coronary heart disease	22	0.967881	0.956004	0.724745	0.97
ANGPTL3	Coronary heart disease	14	0.811124	0.757498	0.723184	0.76
LPL	Coronary heart disease	23	0.54407	0.514688	0.478774	0.42
APOC3	Coronary heart disease	26	0.7107	0.75717	0.195835	0.69
PPARA	Coronary heart disease	2	NA	NA	NA	NA

## Sheet: Table S9
Table S9. Association between genetically proxied targets of lipid-lowering drugs and the risk of Rotator cuff syndrome
Lipid modifying effect	Drug target gene	Methods	SNP	Beta	Se	OR(95%CI)	P value
LDL-C reducing	HMGCR	MR Egger	13	-0.216993	0.301341	0.81 (0.45 , 1.45)	0.486489
		Weighted median	13	-0.32063	0.131843	0.73 (0.56 , 0.94)	0.0150196
		Inverse variance weighted	13	-0.388578	0.102543	0.68 (0.56 , 0.83)	0.000151009
		Simple mode	13	-0.608303	0.238132	0.54 (0.34 , 0.87)	0.0252567
		Weighted mode	13	-0.329848	0.138037	0.72 (0.55 , 0.94)	0.0341625
	PCSK9	MR Egger	21	-0.188831	0.0769339	0.83 (0.71 , 0.96)	0.0239241
		Weighted median	21	-0.144509	0.069831	0.87 (0.76 , 0.99)	0.0385078
		Inverse variance weighted	21	-0.112688	0.056218	0.89 (0.80 , 1.00)	0.0450184
		Simple mode	21	0.00990356	0.138015	1.01 (0.77 , 1.32)	0.943508
		Weighted mode	21	-0.150298	0.064231	0.86 (0.76 , 0.98)	0.0297679
	ABCG5	MR Egger	14	0.0691347	0.208645	1.07 (0.71 , 1.61)	0.746094
		Weighted median	14	0.0484929	0.129761	1.05 (0.81 , 1.35)	0.70862
		Inverse variance weighted	14	0.00875268	0.0968373	1.01 (0.83 , 1.22)	0.927981
		Simple mode	14	0.0696489	0.195553	1.07 (0.73 , 1.57)	0.727431
		Weighted mode	14	0.0696489	0.128522	1.07 (0.83 , 1.38)	0.597038
	APOB	MR Egger	22	-0.114545	0.157236	0.89 (0.66 , 1.21)	0.474759
		Weighted median	22	-0.0124314	0.070377	0.99 (0.86 , 1.13)	0.859791
		Inverse variance weighted	22	0.04598	0.0542109	1.05 (0.94 , 1.16)	0.396344
		Simple mode	22	0.185043	0.103699	1.20 (0.98 , 1.47)	0.0888101
		Weighted mode	22	-0.00462069	0.0758143	1.00 (0.86 , 1.16)	0.951977
	NPC1L1	MR Egger	5	0.197682	1.19297	1.22 (0.12 , 12.63)	0.878926
		Weighted median	5	0.0779061	0.254009	1.08 (0.66 , 1.78)	0.759067
		Inverse variance weighted	5	0.0491879	0.312031	1.05 (0.57 , 1.94)	0.874742
		Simple mode	5	0.409816	0.379129	1.51 (0.72 , 3.17)	0.340541
		Weighted mode	5	0.123615	0.277204	1.13 (0.66 , 1.95)	0.678718
	LDLR	MR Egger	31	-0.0789204	0.0900479	0.92 (0.78 , 1.10)	0.388
		Weighted median	31	-0.0381792	0.0860479	0.96 (0.81 , 1.14)	0.657262
		Inverse variance weighted	31	0.00211716	0.056012	1.00 (0.90 , 1.12)	0.969848
		Simple mode	31	0.0179016	0.158772	1.02 (0.75 , 1.39)	0.910979
		Weighted mode	31	-0.0372686	0.0788018	0.96 (0.83 , 1.12)	0.639678
TG reducing	ANGPTL3	MR Egger	15	-0.0753545	0.295108	0.93 (0.52 , 1.65)	0.802452
		Weighted median	15	-0.0807352	0.125208	0.92 (0.72 , 1.18)	0.519052
		Inverse variance weighted	15	-0.0728096	0.098144	0.93 (0.77 , 1.13)	0.458169
		Simple mode	15	-0.032163	0.212126	0.97 (0.64 , 1.47)	0.881648
		Weighted mode	15	-0.0618722	0.122748	0.94 (0.74 , 1.20)	0.622059
	LPL	MR Egger	39	0.136033	0.0733267	1.15 (0.99 , 1.32)	0.0715533
		Weighted median	39	0.047946	0.051348	1.05 (0.95 , 1.16)	0.350435
		Inverse variance weighted	39	0.0639323	0.0370462	1.07 (0.99 , 1.15)	0.0843934
		Simple mode	39	0.0529326	0.0766839	1.05 (0.91 , 1.23)	0.49422
		Weighted mode	39	0.0612348	0.0506086	1.06 (0.96 , 1.17)	0.233764
	APOC3	MR Egger	28	-0.0143256	0.0683843	0.99 (0.86 , 1.13)	0.835701
		Weighted median	28	0.0442146	0.0484411	1.05 (0.95 , 1.15)	0.361374
		Inverse variance weighted	28	0.0450143	0.0360994	1.05 (0.98 , 1.12)	0.212414
		Simple mode	28	0.0198593	0.0626648	1.02 (0.90 , 1.15)	0.753747
		Weighted mode	28	0.0437112	0.0408632	1.05 (0.96 , 1.13)	0.294226
	PPARA	Inverse variance weighted	2	0.129947	0.530502	1.14 (0.40 , 3.22)	0.806495

## Sheet: Table S10
Table S10. Heterogeneity and pleiotropy tests of instrument effects (drug targets)
Drug target gene	Outcome	SNP	P value for Cochran Q test	P value for MR-Egger heterogeneity	P value for MR-Egger intercept	MR-PRESSO result Global Test
HMGCR	Rotator cuff syndrome	13	0.625212	0.573288	0.557106	0.66
PCSK9	Rotator cuff syndrome	21	0.844397	0.901289	0.163423	0.6
ABCG5	Rotator cuff syndrome	14	0.835202	0.783513	0.749505	0.87
APOB	Rotator cuff syndrome	22	0.980129	0.985916	0.289706	0.23
NPC1L1	Rotator cuff syndrome	5	0.0675003	0.0334602	0.904405	0.88
LDLR	Rotator cuff syndrome	31	0.682694	0.702369	0.259803	0.46
ANGPTL3	Rotator cuff syndrome	15	0.992658	0.986347	0.992843	0.21
LPL	Rotator cuff syndrome	39	0.579147	0.59438	0.261862	0.08
APOC3	Rotator cuff syndrome	28	0.641054	0.646366	0.316336	0.32
PPARA	Rotator cuff syndrome	2	NA	NA	NA	NA

[truncated: 3 more sheets: Table S11, Table S12, Table S13]
